# Supplementary material for: The Synergistic Effects of Environmental and Genetic Factors on the Regulation of Anthocyanin Accumulation in Plant Tissues
Source: MDPI journal article supplement (doi:10.3390/ijms241612946), 2023-08-18
Supplement: s1 [file s1]

# Synergistic Effects of Environmental and Genetic Factors on Regulation of Anthocyanin Accumulation in Plant Tissues

Van Giap Do\*, Youngsuk Lee, Jeong-Hee Kim, Young-Soon Kwon, Jong-Taek Park, Sangjin Yang, Juhyeon Park, Nay Myo Win, Seonae Kim\*

## Supplementary Table:

- Table S1. Fruit characteristic and colorimetric coordinates of 'RubyS' before treatment
- Table S2. Sequences of primers used for qRT-PCR and RT-PCR

## Supplementary Figure:

- Figure S1. DNA sequence (CDS) of the three anthocyanin biosynthesis-related genes (*MdCHS*, *MdANS*, and *MdUFGT1*) cloned in this study
- Figure S2. A packing vector pMG-Kan for subcloning the synthesized CDS of three anthocyanin biosynthesis-related genes (*MdCHS*, *MdANS*, and *MdUFGT1*).
- Figure S3. Vector construction of *MdCHS* gene in the packing vector pMG-Kan
- Figure S4. Vector construction of *MdANS* gene in the packing vector pMG-Kan
- Figure S5. Vector construction of *MdUFGT1* gene in the packing vector pMG-Kan
- Figure S6. Gene cloning and Agrobacterium transformation of *MdCHS* gene for transient overexpression
- Figure S7. Gene cloning and Agrobacterium transformation of *MdANS* gene for transient overexpression
- Figure S8. Gene cloning and Agrobacterium transformation of *MdUFGT1* gene for transient overexpression
- Figure S9. Gene cloning and Agrobacterium transformation of *MdCHS* gene for stable overexpression
- Figure S10. Expression profile of anthocyanin biosynthesis-related genes in the Agroinfiltrated leaves of *Nicotiana benthamiana*.

**Table S1.** Fruit characteristic and colorimetric of 'RubyS' before treatment

| Group       | Fruit characteristics  |                       |                        |                         |                        |                        |                   | Colorimetric coordinates |                         |                         |
|-------------|------------------------|-----------------------|------------------------|-------------------------|------------------------|------------------------|-------------------|--------------------------|-------------------------|-------------------------|
|             | Weight (g)             | Vertical length (cm)  | Horizontal length (cm) | Firmness (N)            | SSC (°Brix)            | Acidity (%)            | Starch index      | L                        | a                       | b                       |
| MOCK        | 74.0±7.6 <sup>a</sup>  | 53.9±3.6 <sup>a</sup> | 57.1±3.8 <sup>a</sup>  | 44.79±7.74 <sup>a</sup> | 12.3±0.40 <sup>a</sup> | 1.50±0.11 <sup>a</sup> | 1.53 <sup>a</sup> | 67.39±1.93 <sup>a</sup>  | -6.64±1.12 <sup>a</sup> | 28.63±0.51 <sup>a</sup> |
| CHS::31070  | 75.0±7.11 <sup>a</sup> | 53.7±3.8 <sup>a</sup> | 56.6±2.5 <sup>a</sup>  | 43.89±7.11 <sup>a</sup> | 12.4±0.47 <sup>a</sup> | 1.50±0.08 <sup>a</sup> | 1.53 <sup>a</sup> | 65.59±1.88 <sup>a</sup>  | -7.32±1.87 <sup>a</sup> | 27.55±0.92 <sup>a</sup> |
| ANS::31070  | 75.6±5.5 <sup>a</sup>  | 52.2±2.6 <sup>a</sup> | 55.9±3.4 <sup>a</sup>  | 44.12±5.83 <sup>a</sup> | 12.1±0.35 <sup>a</sup> | 1.50±0.05 <sup>a</sup> | 1.46 <sup>a</sup> | 66.49±2.07 <sup>a</sup>  | -6.39±2.16 <sup>a</sup> | 27.66±0.90 <sup>a</sup> |
| UFGT::31070 | 74.3±5.2 <sup>a</sup>  | 51.8±3.0 <sup>a</sup> | 55.1±2.6 <sup>a</sup>  | 42.52±4.88 <sup>a</sup> | 12.0±0.32 <sup>a</sup> | 1.50±0.02 <sup>a</sup> | 1.57 <sup>a</sup> | 66.39±2.88 <sup>a</sup>  | -6.99±2.78 <sup>a</sup> | 27.71±1.04 <sup>a</sup> |
| MIX         | 75.7±6.1 <sup>a</sup>  | 52.9±2.8 <sup>a</sup> | 57.1±3.3 <sup>a</sup>  | 41.12±6.57 <sup>a</sup> | 12.2±0.45 <sup>a</sup> | 1.51±0.07 <sup>a</sup> | 1.60 <sup>a</sup> | 66.47±3.73 <sup>a</sup>  | -6.23±2.20 <sup>a</sup> | 27.32±1.02 <sup>a</sup> |

Data are means ± SD of three replications. Different letters above the bars indicate significant ( $P < 0.05$ ) differences according to the t-test.

**Table S2.** Sequences of primers used in gDNA PCR and qRT-PCR

| Gene                     | Encoded protein                                       | Primer sequence (5'-3') |                                  | Used for            |
|--------------------------|-------------------------------------------------------|-------------------------|----------------------------------|---------------------|
| <i>MdCHS</i>             | Chalcone synthase                                     | F                       | GCTCTAGAATGGTTACAGTCGAGGAAGTTTCG | gDNA<br>PCR         |
|                          |                                                       | R                       | GGTCTCTCAGTGATGGTGATGGTGATGAGC   |                     |
| <i>HPTII</i>             | Hygromycin<br>phosphotransferase                      | F                       | CTCGGAGGGCGAAGAATCTC             | (in rice<br>callus) |
|                          |                                                       | R                       | CAATGACCGCTGTTATGCGG             |                     |
| <i>MdCHS</i>             | Chalcone synthase                                     | F                       | GGACTGGAACCTCACTCTTC             | qRT-<br>PCR         |
|                          |                                                       | R                       | GCCGTAATCTGACAACAC               |                     |
| <i>MdANS</i>             | Anthocyanidin<br>synthase                             | F                       | GCTGGAGAAAGAAGTTGG               |                     |
|                          |                                                       | R                       | GGAGGATGAAGGTGAGTG               |                     |
| <i>MdUFGT</i>            | UDP-glucose:<br>flavonoid-3-O-glucosyl<br>transferase | F                       | CAACATCCAAGGTCTCTC               |                     |
|                          |                                                       | R                       | GTCCCATCTGAAGTAGCA               |                     |
| <i>OsUbi1</i>            | Polyubiquitin1                                        | F                       | CACGGTTCAACAACATCCAG             |                     |
|                          |                                                       | R                       | TGAAGACCCTGACTGGGAAG             |                     |
| <i>NbAct</i>             | Actin                                                 | F                       | CGAGCGGGAAATTGTTAGGG             |                     |
|                          |                                                       | R                       | CGTAGCTCTTCTCCACGGAT             |                     |
| <i>Tnos</i> <sup>*</sup> | Nopaline synthase<br>terminator                       | F                       | CATGTAATGCATGACGTTATTTATG        |                     |
|                          |                                                       | R                       | TTGTTTTCTATCGCGTATTAAATGT        |                     |

*Tnos*<sup>\*</sup>: This primer was selected from a previous report by the EU, which was used as a reference method for the detection of *Nopaline synthase* terminator in GMO crops. See the detail at <https://gmo-crl.jrc.ec.europa.eu/gmomethods/docs/QL-ELE-00-011.pdf>

## **Supplementary Figure S1:**

### **1/ *Malus x domestica* MdCHS mRNA for chalcone synthase, complete cds**

GenBank: [AB074485.1](#)

Gene: 1..1176

CDS: 1..1176

[5' **BsaI-XbaI** \_MdCHS\_ **6HisTag-Stop-BsaI-Acc65I/KpnI** 3']

GGTCTCTCTAGAAATGGTTACAGTCGAGGAAGTTTCGCAAGGCTCAACGGGCGGAGGGTCCAGCCACAGTCATGG  
CCATCGGGACAGCAACTCCTTCCAAGTGTGTGGATCAGGCTACCTACCCCGACTACTACTTTTCGTATCACCAA  
CAGCGAGCACAAGGTTGAGCTCAAAGAAAAATTCAGCGCATGTGCGACAAATCTATGATCAAGAAACGTTAT  
ATGTACTTGACTGAAGAAATTTTAAAAGAGAACCCAAAGTGTGTGCGAGTACATGGCTCCTTCAATTGATGCAA  
GGCAGGACATGGTGGTTGTGGAAGTCCCAAACTTGGCAAAGAGGCTGCCATCAAAGCCATCAAGGAATGGGG  
ACAGCCCAAGTCCAAATCACCCACTTGGTCTTTTGCACCACCAGCGGTGTCGACATGCCTGGAGCCGACTAC  
CAACTCACCAAGCTCTTGGGCCTCCGCCCCCTCCGTCAAGCGCCTCATGATGTACCAACAAGGGTGCTTCGCCG  
GTGGGACGGTCCCTCCGTTTGGCCAAGGACTTGGCCGAAAACAACAAGGGTGACAGTGTCTTGTGTGTGTGCTC  
TGAGATCACCGCGGTTACCTTCCGAGGGCCTAGTGACACCCACCTTGATAGTCTTGTGGGCCAAGCTTTGTTT  
GGCGACGGTGCAGCGGCCGTATCATTTGGTGCAGTCCAGTGCCCGAAGTCGAGAAGCCCTTGTGTTGAATTGG  
TGTCGGCGGCACAAACCATCTCCCCGACAGTGATGGGGCTATCGACGGACATCTCCGTGAAGTAGGGCTTAC  
ATTTACCTTCTCAAGGATGTTCCCGGACTTATTTCAAGAACATCGAAAAGAGCCTTAACGAGGCCTTCAAG  
CCTATTGGGATTTTCGACTGGAACTCGCTCTTCTGGATTGCACACCCAGGTGGCCCTGCTATTCTGGACCAAG  
TAGAGGCCAAGTTGGCACTGAAGCCGGAGAACTAGAAGCAACAAGGCAAGTGCTGTCGGATTACGGTAACAT  
GTCGAGTGCGTGTGTGCTTTTATTTTGGACGAGGTCAGGAGGAAGTCCGCCGAGAAAGGACTCAAAACGACC  
GGGGAGGGACTGGAGTGGGGTGTGCTTTTCGGATTTGGGCCCGGCCCTCACGGTGGAACCGTCTGTGCTTCACA  
GCGTGGGTTTAAACGGCTCATCACCATCACCATCACTGAGGTCTCGGTACCGG

### **2/ *Malus domestica* anthocyanidin synthase (ANS)mRNA, complete cds**

GenBank: [AF117269.1](#)

Gene: 1..1413

CDS: 90..1163

[5' **BsaI-XbaI-BamHI** \_MdANS\_ **6HisTag-Stop-BsaI-Acc65I/KpnI** 3']

GGTCTCTCTAGAGGATCCATGGTGAGCTCTGATTCAAGTGAATTCAAGGGTTGAAACCTTGGCCGGCAGTGGA  
TCTCAACCATCCCCAAAAGAGTACATCAGACCTAAAGATGAGCTCGTAAACATTGGTGACATCTTCGAACAAGA  
GAAGAACAACGAAGGGCCTCAAGTTCCCACCATCGATTTGAAGGAGATAGAGTCTGATAACGAAAAGTGAGA  
GCAAAATGCAGGGAGAAAGTTGAAGAAGGCAGCTGTGGAAGTGGGGTGTATGCACCTTGTGAACCATGGCATCT  
CCGACGAGCTCATGGACAAGGTCAGGAAGGCCGGTAAGGCCTTCTTTGACCTTCCCATTGAGCAGAAGGAGAA  
GTATGCCAATGACCAGGCCTCTGGTAAGATTCAAGGCTATGGAAGCAAGCTTGCAAACAATGCATCTGGGCAG  
CTTGAGTGGGAGGACTACTTCTTCCACTGTGTATACCCAGAGGACAAGCGTGACTTGTCAATTTGGCCTCAAA  
CACCTGCTGATTACATTGAGGCAACCGCCGAGTATGCTAAGCAATTGAGGGAGCTAGCAACCAAGGTAAGTAA  
AGTTCTGTCACTTGGCTTGGGATTGGATGAAGGGAGGCTGGAGAAAGAAGTTGGTGGACTTGAAGAGCTCCTC  
TTGCAAATGAAAATCAACTACTACCCAAAATGCCCTCAGCCGGAGCTTGCACTTGGTGTGAAGCTCACACTG  
ACGTGAGTGCACCTCACCTTCATCCTCCACAACATGGTTCTTGGCCTGCAGCTTTTCTATGAAGGAAAGTGGGT  
CACTGCCAAGTGCGTTCCAAATTCATCGTCATGCACATTGGGGACACACTTGAGATTTTGAGCAATGGGAAG  
TACAAAAGTATACTCCACAGGGGCATGGTGAACAAGGAAAAGGTGAGGATTTTCATGGGCTGTTTTCTGTGAGC  
CACCAAAGGAGAAGATCATCCTTAAGCCACTGCCGGAACCGTGTCTGAGGACGAGCCGGCAATGTTCCACC  
ACGAACCTTTGCTGAGCACATTCAGCACAAGTTGTTTCAGGAAGAGCCAAGAGGCTTTGCTCCCCAAGCATCAC  
CATCACCATCACTGAGGTCTCGGTACCGG

**3/ *Malus domestica* UDP glucose:flavonoid 3-O-glucosyl transferase (UGT1)mRNA, complete cds**

GenBank: [AF117267.1](#)

Gene: 1..1819

CDS: 72..1523

[5' **BsaI**-**XbaI**-**BamHI**\_MdUGT1\_**6HisTag**-**Stop**-**BsaI**-**Acc65I**/**KpnI** 3']

GGTCTCTCTAGAGGATCCATGGCAGCGCCGCTGCCCATCGAAATCGAACCATCATCAACTAATGGTCAACCCC  
ATCTCGCCGACGCCTACAACCGTCACGTGGCTGTCTGATGCCTTCCCTTTCCTAGCCATGCAAGCGCCTTGCT  
TGAAACCGTGCGCCGCTAGCCACCGCCCTTCCAAACACTCTCTCTCGTTCTTCAGCACTTCAAAATCCAAC  
AGCTCTCTCTTTTCCAACAACAGCATTGATAACATGCCGCGTAACATAAGGGTGTACGATGTGGCTGACGGGG  
TGCCGGAGGGGTACGTTTTCGTGGGCAAGCCGAGGAGGACATAGAGCTCTTCATGAATGCCGCACCGGAAAA  
CATCCGGAGGAGCTTAGACGCTTCCGTGGCGGACATCGGGAAGCAGATCAGCTGCTTGATCACCGACGCCTTC  
CTTTGGTTTGGAGTCCACTTGGCTGACGAGTTGGGAGTGCCTTGGGTCACTTTCTGGATCTCCGGACTCAAAT  
CCCTCTCCGTTTCATGTGCATACTGATCTCATCCGCGACACTATTGGAACCTCAAGGCATTACAGGTCGTGAAAA  
CGACCTCATCGTCGACAAAAATGTTAACATCCAAGGACTCTCCAATGTACGAATCAAAGACTTAGCGGAAGGA  
GTCATTTTTCGGAACCTTGGACTCGGTAATTTCCGGCATGCTACTTCAGATGGGACGGCTCCTCCCCCGTGCCA  
CCGCAGTTTTTCATGAACGGCTTCGAAGAATTGGAACCTCCCATACCAAACGACCTAAAGTCCAAAGTCAACAA  
ACTCCTCAACGTAGGACCTTCCAACGTAGCATCCCCGCTGCCACCGCTGCCGCCATCAGATGCTTGCTTGTCAT  
TGGCTAGACAAGCAACAGGCTCCATCCTCCGTCTGTACATAAGCTTCGGGACAGTGGCGAGCCCAGCGGAGA  
AGGAGCAGATGGCAATAGCGGAGGCCCTGGAAGCCACCGGAGCACCTTCTTGTGGTCTATCAAGGACAGCTG  
CAAGACACCGTTGCTGAACGAGTTCTTGACAAAAACATTGTCAAAGCTGAACGGGATGGTGGTGCCGTGGGGCT  
CCACAGCCGCATGTACTGGCCACGATTCGGTCGGAGCCTTCGTGTCTGCATTGCGGCTGGAACCTCGATAATGG  
AGACTATAGCAGGACGGGTGCCCATGATTTGTAGGCCATATTTTGCAGACCAGAGGCTTAATGCAAGGATGGT  
GGAGGAGGTGTTTGTAGATCGGGGTAACCGTGGAGGATGGAGTTTTTACCAGGGAGGGGCTGGTAAAAAGCTTG  
GAAGTGGTTTTGTGCGCTGAAAGTGGGAGGAAATTCAGAGACAATATAAAGAGGGTCAAACAACCTGGCAGTAG  
AGGCGGTTGGACCACAAGGGAGCTCCACTCGGAACCTCAAATCGCTGTTGGACATCGTATCAGGTTCCAATTA  
TCAAGTACATCACCATCACCATCACTAGGGTCTCGGTACCGG

**Figure S1.** DNA sequence (CDS) of three anthocyanin biosynthesis-related genes (*MdCHS*, *MdANS*, and *MdUGT1*) cloned in this study. They were synthesized containing restriction enzyme sites in colored for cloning purposes.

## pMG-Kan Map •

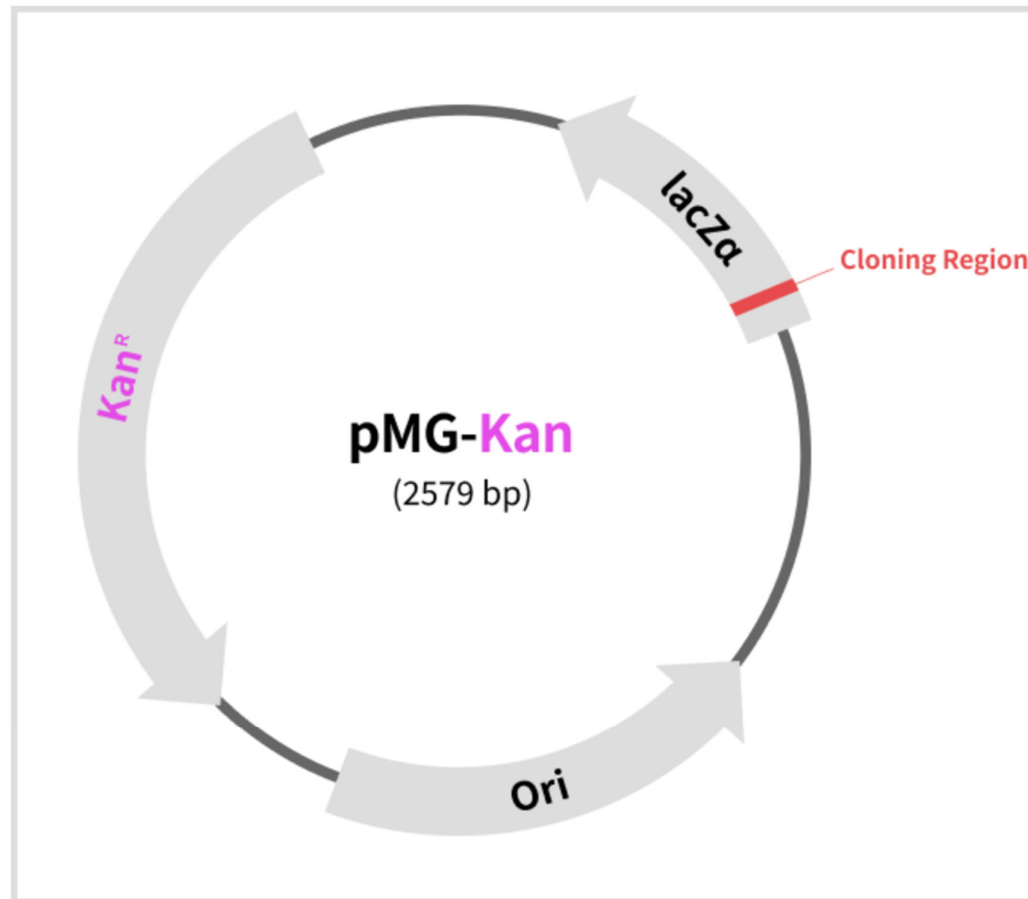

### Cloning Region

```

GTTTCCAGTCACGACGCTGTAAAACGAC
GGCCAGTGAATTACTTGAAGGTACTTCTCT
AATACATCTTGAAATCGGGTCCC/ GGGCTC
TACGAGAGCACAGTCCGGCGTGCAGAGAT
GGCGTAATCATGGTCATAGCTGTTTCCTGT
GTGAAATTGTTATCCGC
  
```

### Sequencing Primer

|          |                       |
|----------|-----------------------|
| M13F-pUC | GTTTCCAGTCACGAC       |
| M13R     | GCGGATAACAATTCACACAGG |

**Figure S2.** A packing vector pMG-Kan for subcloning the synthesized CDS of three anthocyanin biosynthesis-related genes(*MdCHS*, *MdANS*, and *MdUFGT1*).

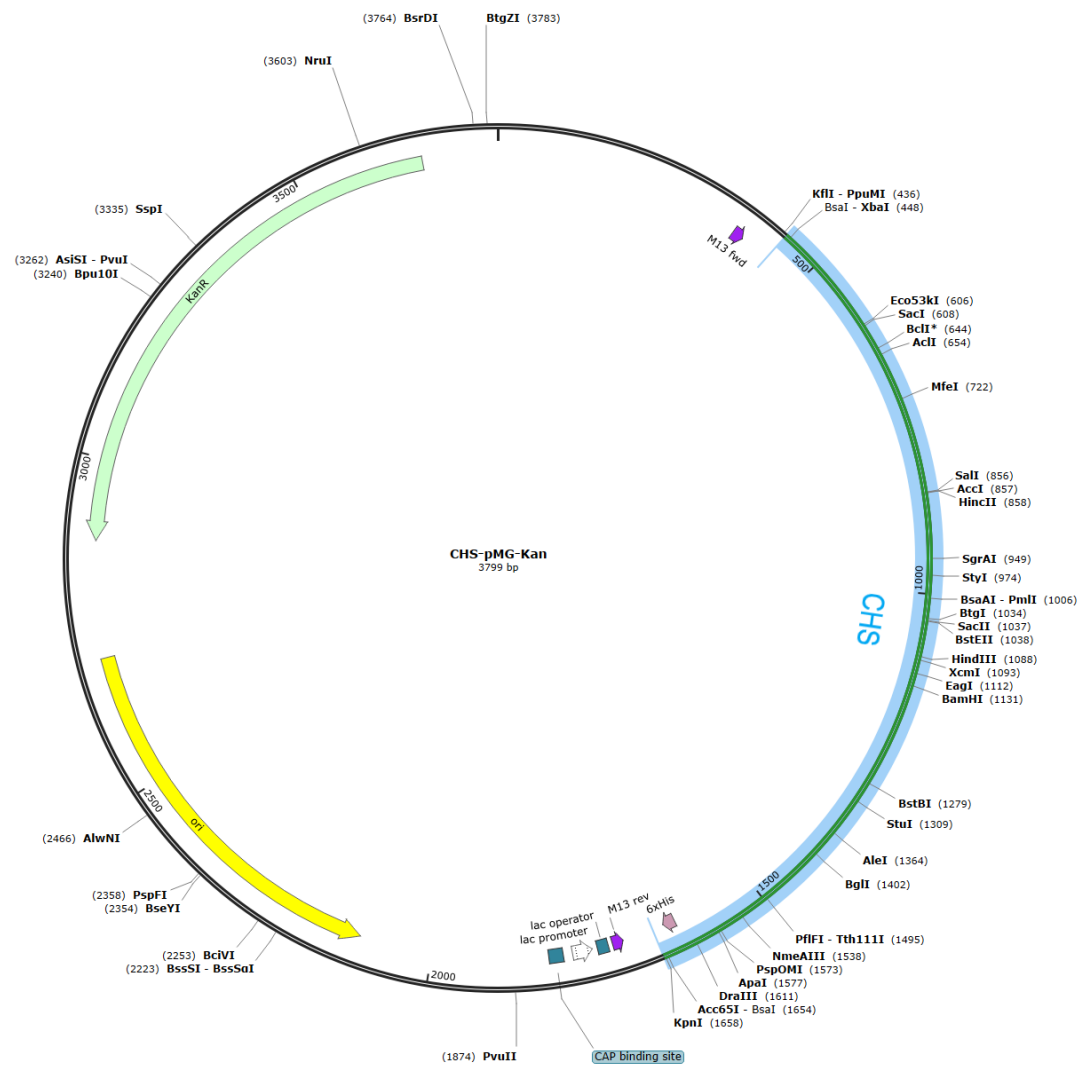

**Figure S3.** Vector construction of *MdCHS* gene in the packing vector pMG-Kan.

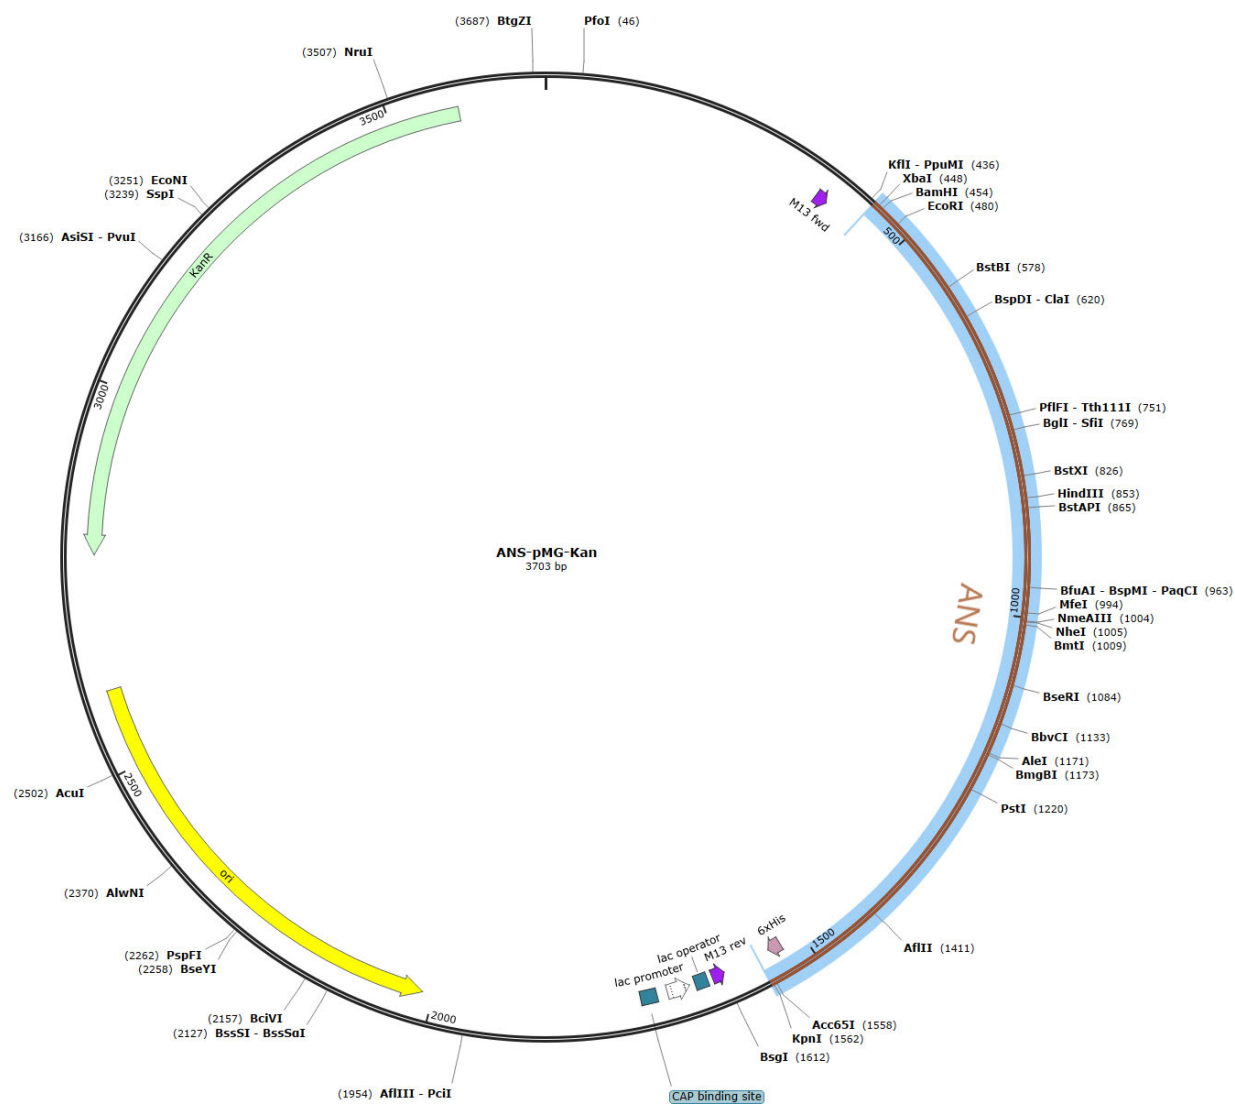

**Figure S4.** Vector construction of *MdANS* gene in the packing vector pMG-Kan.

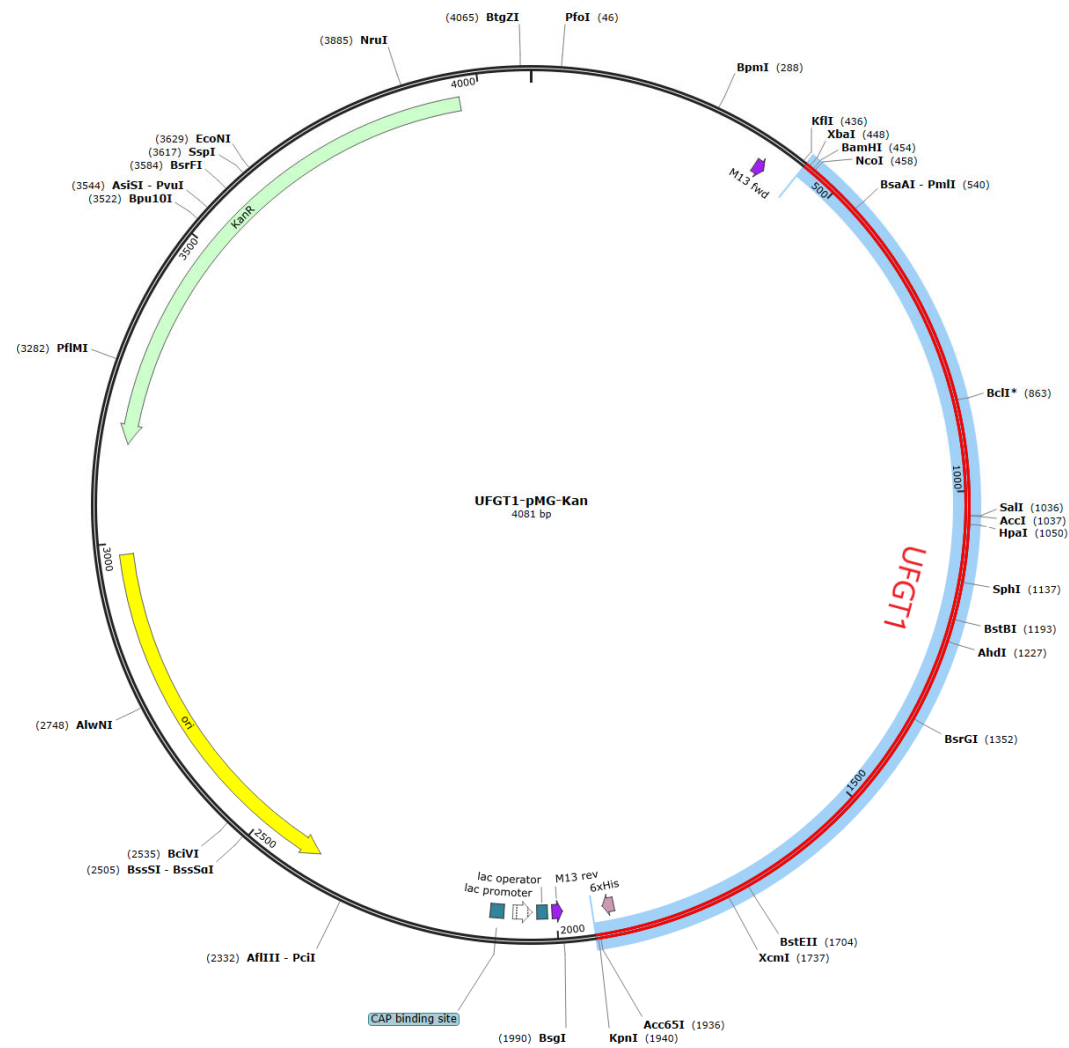

**Figure S5.** Vector construction of *MdUFGT1* in the packing vector pMG-Kan.

### Chalcone synthase (CHS)

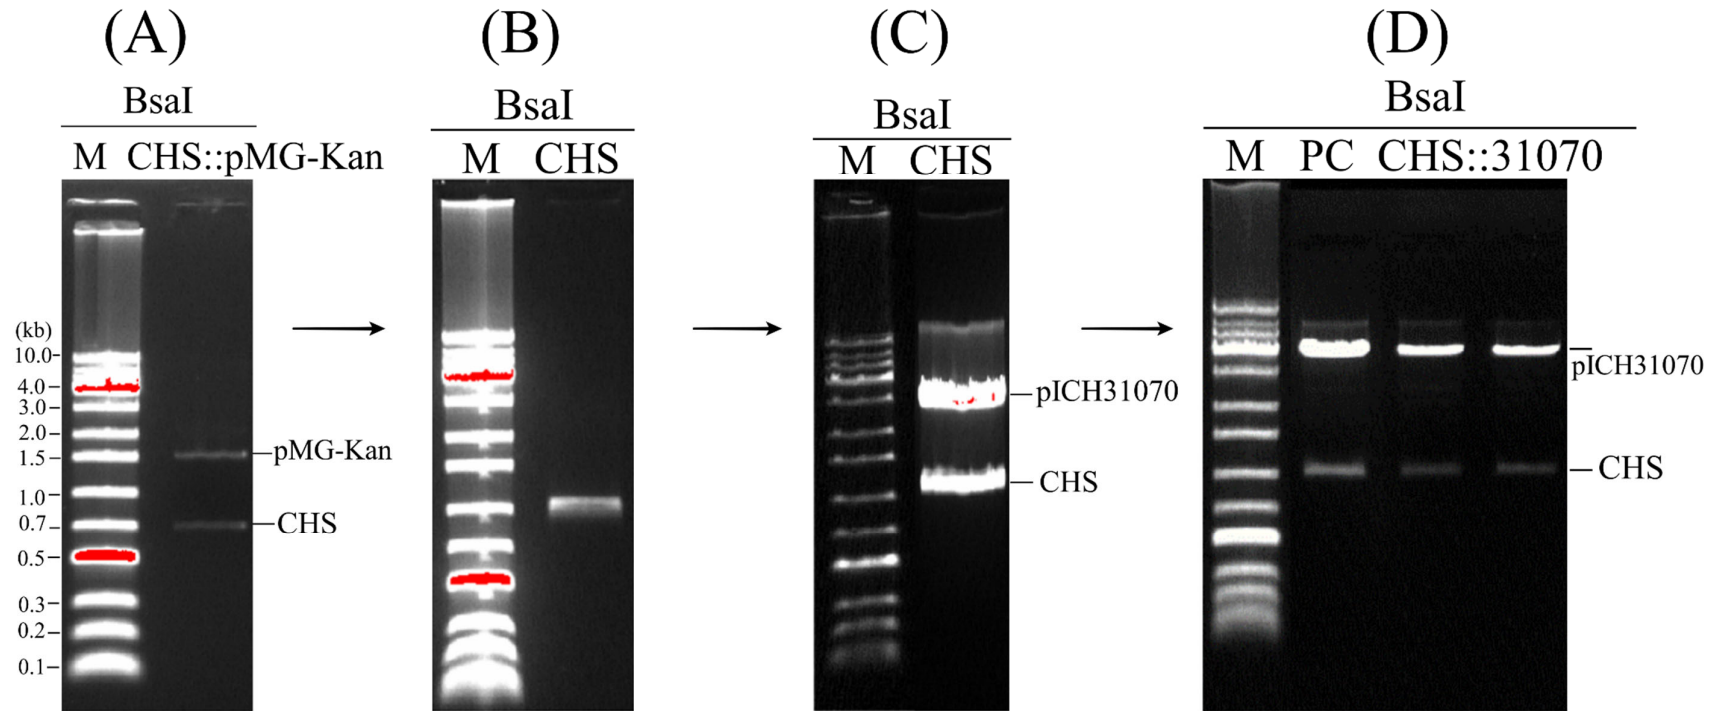

**Figure S6.** The synthesized CDS of *MdCHS* containing a *BsaI* site at the 5'end and the 3'end were subcloned on packing vector pMG-Kan was digested with *BsaI* (A) and then the digested fragments were eluted and cleaned up from agarose gel using the fragment DNA purification kit (iNtRON Biotechnology) before cloning into the plant expression vector pICH31070, resulted CHS::pICH30170. The constructed expression vector CHS::pICH30170 was transformed into *E.coli* DH5 $\alpha$  then was confirmed by *BsaI* enzyme digestion (C). The expression vector was transformed into *A. tumefaciens* EHA105 and then its plasmid DNA was isolated and confirmed by *BsaI* enzyme digestion (D). M is 1kb plus DNA ladder (Cat.#A738, Dyne Bio Inc. Seongnam-si, Korea).

## Anthocyanidin Synthase (ANS)

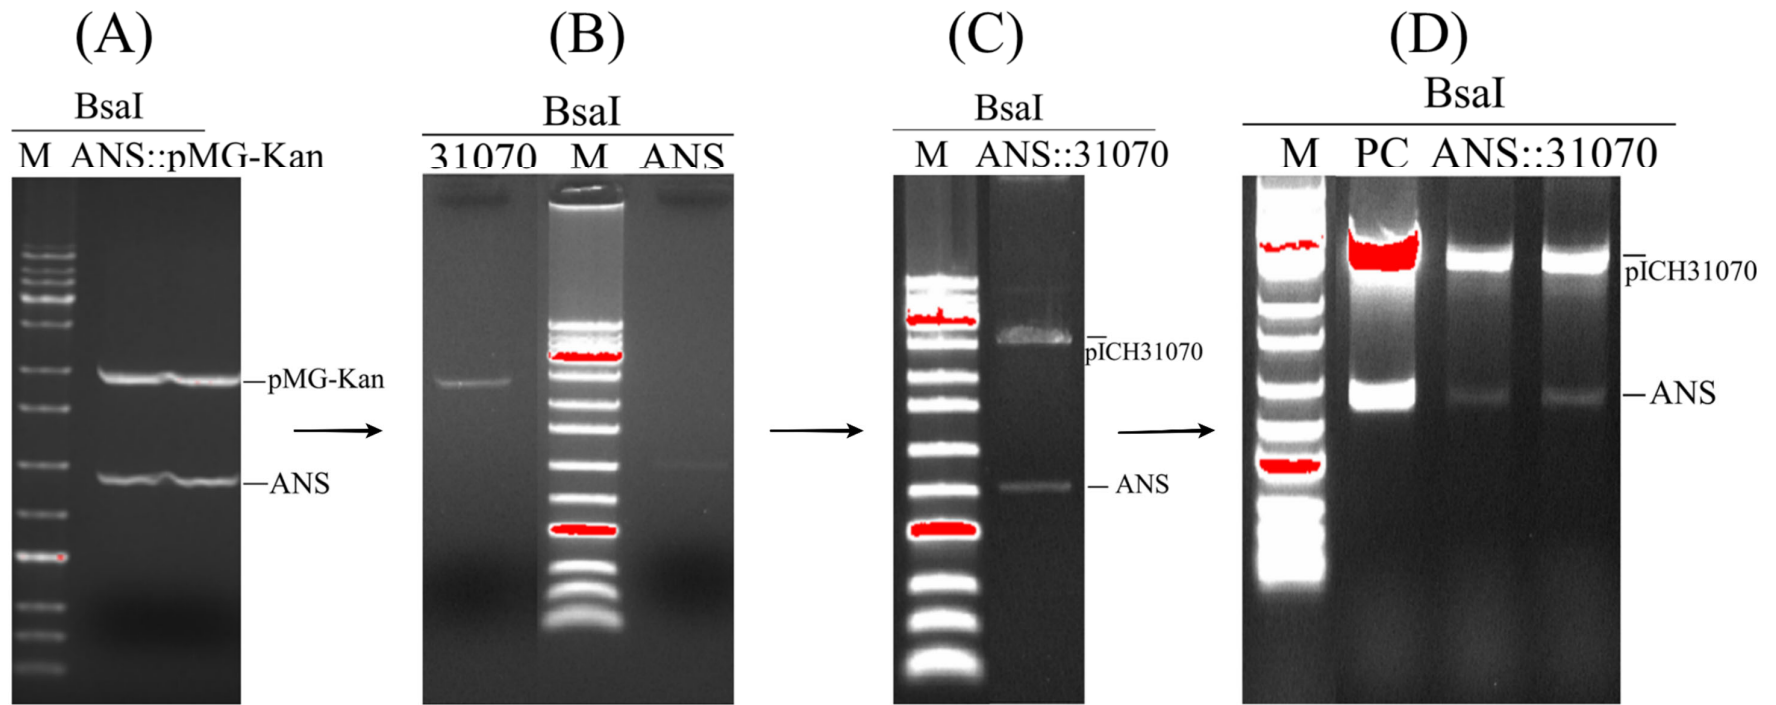

**Figure S7.** The synthesized CDS of *MdANS* containing a *Bsa*I site at the 5'end and the 3'end were subcloned on packing vector pMG-Kan was digested with *Bsa*I (A) and then the digested fragments were eluted and cleaned up from agarose gel using the fragment DNA purification kit (iNtRON Biotechnology) before cloning into the plant expression vector pICH31070, resulted ANS::pICH31070. The constructed expression vector ANS::pICH31070 was transformed into *E.coli* DH5 $\alpha$  then was confirmed by *Bsa*I enzyme digestion (C). The expression vector was transformed into *A. tumefaciens* EHA105 and then its plasmid DNA was isolated and confirmed by *Bsa*I enzyme digestion (D).

# UDP-Glucose: Flavonoid 3-O-Glucosyl Transferase (UGFT)

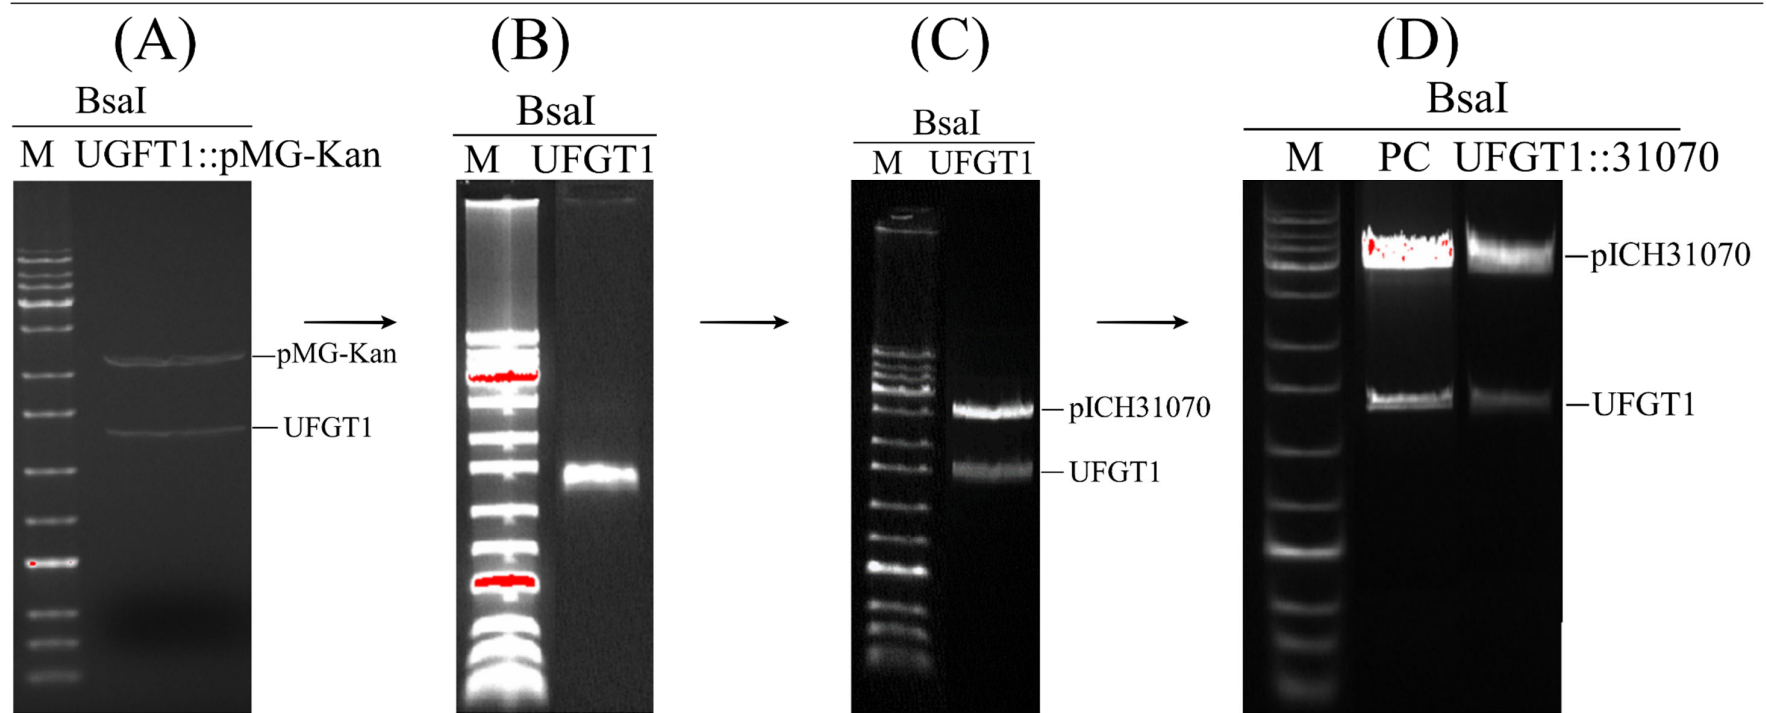

**Figure S8.** The synthesized CDS of *MdUGFT1* containing a BsaI site at the 5'end and the 3'end were subcloned on packing vector pMG-Kan was digested with BsaI (A) and then the digested fragments were eluted and cleaned up from agarose gel using the fragment DNA purification kit (iNtRON Biotechnology) before cloning into the plant expression vector pICH31070, resulted UGFT1::pICH30170. The constructed expression vector UGFT1::pICH30170 was transformed into *E.coli* DH5 $\alpha$  then was confirmed by BsaI enzyme digestion (C). The expression vector was transformed into *A. tumefaciens* EHA105 and then its plasmid DNA was isolated and confirmed by BsaI enzyme digestion (D).

### Chalcone synthase (CHS) for stable overexpression

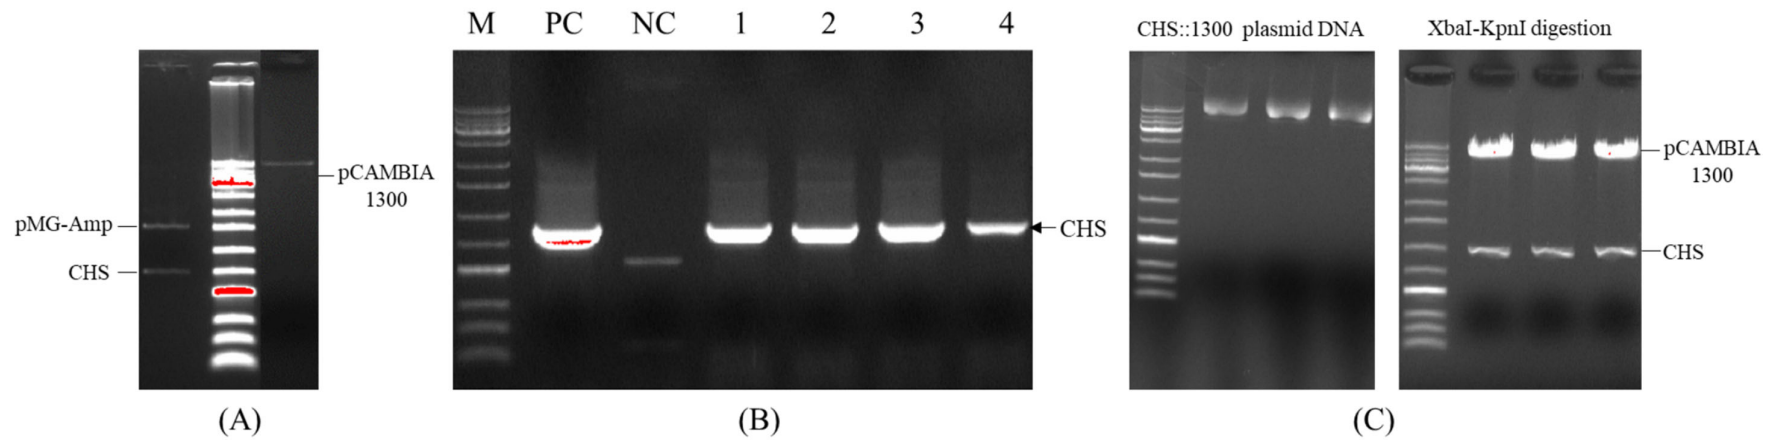

**Figure S9.** The synthesized CDS of *MdCHS* containing a XbaI site at the 5'-end and a KpnI site at the 3'-end were subcloned on packing vector pMG-Amp was digested with XbaI and KpnI (A) and then the digested fragments were eluted and cleaned up from agarose gel using the fragment DNA purification kit (iNtRON Biotechnology) before cloning into the plant expression vector pMYD320. The constructed expression vector was transformed into *E. coli* DH5α and then was confirmed by colony PCR (B). The plasmid DNA of transformed *A. tumefaciens* LBA4404 and XbaI/KpnI double enzyme digestion of its (C).

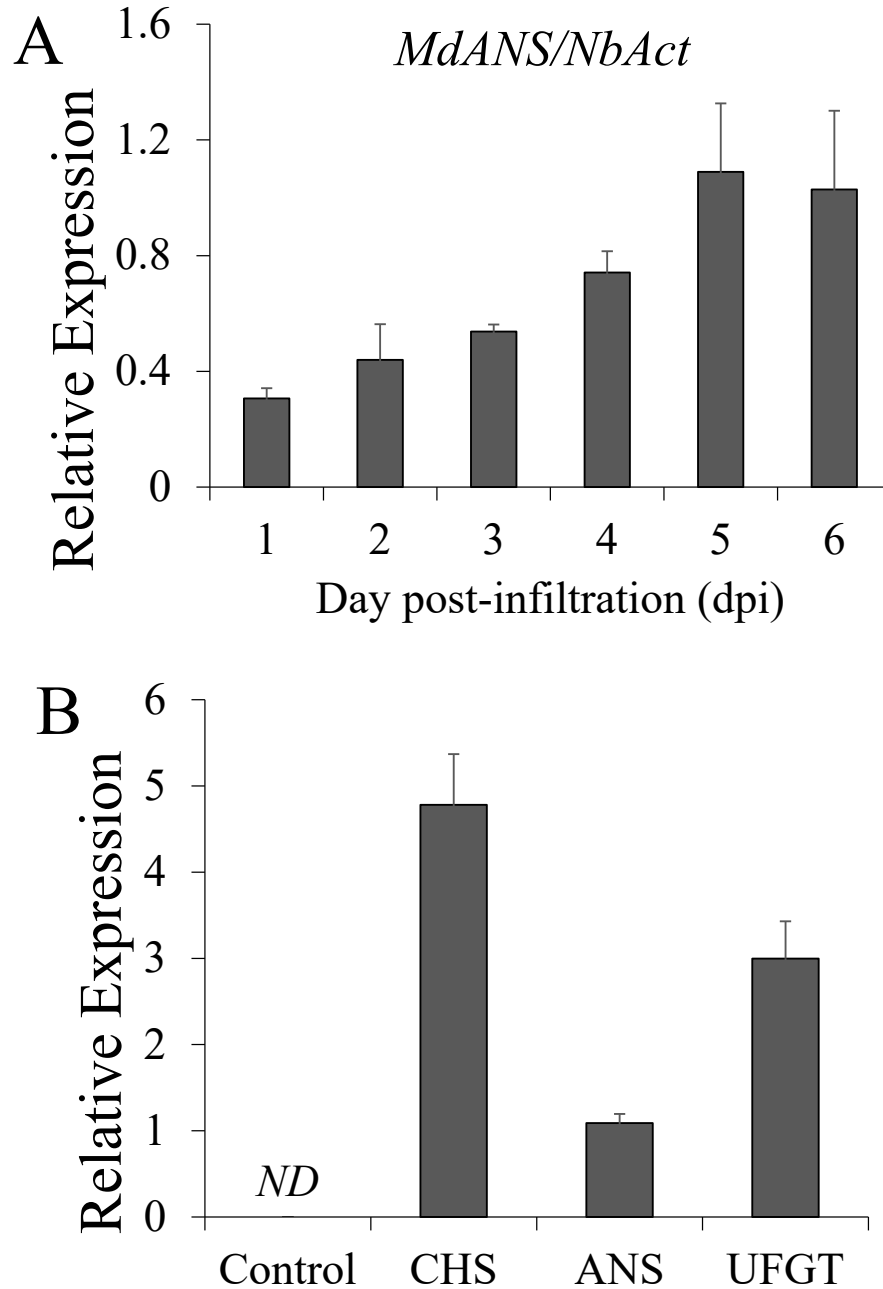

**Figure S10.** Expression profile of anthocyanin biosynthesis-related genes in the Agrobacterium-infiltrated leaves of *Nicotiana benthamiana*. (A) The transcript expression of *MdANS* was analyzed at different time course (1-6 dpi). (B) The expression profile of three anthocyanin biosynthesis-related genes (*MdCHS*, *MdANS*, and *MdUFGT*) at 5 dpi. Tobacco leaves were infiltrated with *Agrobacterium* OD<sub>600</sub> = 0.6 and the transcript expression was calculated via normalization to the reference gene *NtAct*. Data are presented as mean  $\pm$  SD (n = 3) of three biological replicates. ND refers to non-detectable.
